# Supplementary material for: Green-Based Approach to Synthesize Silver Nanoparticles Using the Fungal Endophyte Penicillium oxalicum and Their Antimicrobial, Antioxidant, and In Vitro Anticancer Potential
Source: PubMed Central journal article supplement — ACS Omega. 2022 Dec 7;7(50):46653–73. doi: 10.1021/acsomega.2c05605 (PMC9774420; doi:10.1021/acsomega.2c05605), 2022-12-07
Supplement: ao2c05605_si_001.pdf [file ao2c05605_si_001.pdf]

## Supplementary information

### Title

Green-Based Approach to Synthesize Silver Nanoparticles Using the Fungal Endophyte *Penicillium oxalicum* and Their Antimicrobial, Antioxidant, and *In Vitro* Anticancer Potential

### Authors

Priyamvada Gupta<sup>1</sup>, Nilesh Rai<sup>1#</sup>, Ashish Verma<sup>1#</sup>, Dimple Saikia<sup>2</sup>, Surya Pratap Singh<sup>2</sup>, Rajiv Kumar<sup>1</sup>, Santosh Kumar Singh<sup>1</sup>, Deepak Kumar<sup>3</sup>, Vibhav Gautam<sup>\*1</sup>

### Affiliation

<sup>1</sup>*Centre of Experimental Medicine and Surgery, Institute of Medical Sciences, Banaras Hindu University, Varanasi-221005, India*

<sup>2</sup>*Department of Biosciences and Bioengineering, Indian Institute of Technology Dharwad, Dharwad 580011, India*

<sup>3</sup>*Department of Botany, Institute of Science, Banaras Hindu University, Varanasi-221005, India*

*# Authors contributed equally to this work*

### \*Corresponding author:

Dr. Vibhav Gautam

### Address:

Centre of Experimental Medicine and Surgery,  
Institute of Medical Sciences  
Banaras Hindu University  
Varanasi 221005, India  
Telephone: +918860182113  
Email: [vibhav.gautam4@bhu.ac.in](mailto:vibhav.gautam4@bhu.ac.in)

**Table S1.** FTIR analysis of POAgNPs

| <b>Wavenumber</b> | <b>Functional group</b>                                    | <b>Types of Vibration</b>                         |
|-------------------|------------------------------------------------------------|---------------------------------------------------|
| 3295.71           | Hydroxyl group                                             | OH stretch                                        |
| 1635.67           | Alkenyl                                                    | C=C stretch                                       |
| 1541.60           | Aliphatic nitro compound                                   |                                                   |
| 1043.84           | Aliphatic fluoro compounds<br>or Aromatic or Primary amine | C-F stretch or C-H in plane<br>bend or CN stretch |
| 516.36            | Aliphatic iodo compounds                                   | C-I stretch                                       |

**Table S2.** Representation of calculated values for MIC<sub>25</sub>, MIC<sub>50</sub>, MIC<sub>75</sub> determined for POAgNPs and positive control against pathogenic bacterial and fungal strains

| S. No | Samples                           | Minimum inhibitory concentration of POAgNPs (µg/ml) |                   |                   |                   |                   |                   |                           |                   |                   |                   |                   |                   |                      |                   |                   |                    |                   |                   |
|-------|-----------------------------------|-----------------------------------------------------|-------------------|-------------------|-------------------|-------------------|-------------------|---------------------------|-------------------|-------------------|-------------------|-------------------|-------------------|----------------------|-------------------|-------------------|--------------------|-------------------|-------------------|
|       |                                   | MIC against bacterial strain                        |                   |                   |                   |                   |                   | MIC against fungal strain |                   |                   |                   |                   |                   |                      |                   |                   |                    |                   |                   |
|       |                                   | <i>E. coli</i>                                      |                   |                   | <i>S. aureus</i>  |                   |                   | <i>A. niger</i>           |                   |                   | <i>A. flavus</i>  |                   |                   | <i>A. luchuensis</i> |                   |                   | <i>P. albicans</i> |                   |                   |
|       |                                   | MIC <sub>25</sub>                                   | MIC <sub>50</sub> | MIC <sub>75</sub> | MIC <sub>25</sub> | MIC <sub>50</sub> | MIC <sub>75</sub> | MIC <sub>25</sub>         | MIC <sub>50</sub> | MIC <sub>75</sub> | MIC <sub>25</sub> | MIC <sub>50</sub> | MIC <sub>75</sub> | MIC <sub>25</sub>    | MIC <sub>50</sub> | MIC <sub>75</sub> | MIC <sub>25</sub>  | MIC <sub>50</sub> | MIC <sub>75</sub> |
| 1.    | POAgNPs                           | 8.71±<br>0.217                                      | 12.36±<br>0.099   | 81.85±<br>0.453   | 14.41±<br>0.011   | 20.97±<br>0.008   | 61.61±<br>1.452   | 26.96±<br>0.021           | 37.69±<br>0.050   | 48.42±<br>0.079   | 7.72±<br>0.032    | 67.72±<br>0.193   | 186.57±<br>0.152  | 13.17±<br>0.109      | 20.94±<br>0.116   | 49.08±<br>0.332   | 18.09±<br>0.050    | 34.68 ±<br>0.006  | 188.22±<br>0.145  |
| 2.    | Amphotericin B (Positive control) | -                                                   | -                 | -                 | -                 | -                 | -                 | 10.07±<br>0.021           | 19.29±<br>0.006   | 48.43±<br>0.107   | 16.09±<br>0.218   | 22.86±<br>0.123   | 45.80±<br>0.097   | 7.38±<br>0.009       | 9.82 ±<br>0.009   | 12.26 ±<br>0.010  | 16.12 ±<br>0.074   | 21.79 ±<br>0.195  | 95.92 ±<br>0.424  |
| 3.    | Streptomycin (Positive control)   | 22.20±<br>0.090                                     | 61.08±<br>0.392   | 90.12±<br>0.234   | -                 | -                 | -                 | -                         | -                 | -                 | -                 | -                 | -                 | -                    | -                 | -                 | -                  | -                 | -                 |
| 4.    | Vancomycin (Positive control)     | -                                                   | -                 | -                 | 14.70±<br>0.123   | 36.95±<br>0.177   | 90.47±<br>0.07    | -                         | -                 | -                 | -                 | -                 | -                 | -                    | -                 | -                 | -                  | -                 | -                 |

**Table S3.** Cytotoxic activity of POAgNPs against breast cancer cells and respective IC<sub>30</sub>, IC<sub>50</sub> and IC<sub>70</sub> values

|                                | <b>Breast cancer cells</b> |              |
|--------------------------------|----------------------------|--------------|
|                                | <b>MDA-MB-231</b>          | <b>MCF-7</b> |
| <b>IC<sub>30</sub> (µg/mL)</b> | 8.36±0.404                 | 14.87±0.81   |
| <b>IC<sub>50</sub> (µg/mL)</b> | 20.080±0.761               | 40.038±1.022 |
| <b>IC<sub>70</sub> (µg/mL)</b> | 58.658±6.57                | 104.24±5.85  |

**Table S4.** List of primers alongwith their sequences used in qRT-PCR analysis

| <b>Genes</b>   | <b>Forward (FP) and Reverse (RP) Primers</b>              |
|----------------|-----------------------------------------------------------|
| <i>β-ACTIN</i> | FP- CAGGAATTGTTACGGTTCCTAA<br>RP- CCTGAATTA ACTTGTCCCGTGA |
| <i>BAX</i>     | FP- CCAAGAAGCTGAGCGAGTGT<br>RP- CCGGAGGAAGTCCAATGTC       |
| <i>BCL-2</i>   | FP- GGGTATGAAGGACCTGTATTGG<br>RP- CATGCTGATGTCTCTGGAATCT  |
| <i>P21</i>     | FP- ATGAGTTGGGAGGAGGCAG<br>RP- GGCGTTTGGAGTGGTAGAA        |
| <i>P53</i>     | FP- CCATCTACAAGCAGTCACAG<br>RP- TCATCCAATACTCCACACG       |

**Figure legends:**

**Figure S1.** Antibacterial activity of POAgNPs represented through zone of inhibition against pathogenic bacterial strains.

**Figure S2.** Representation of POAgNPs induced growth inhibition of pathogenic fungal strains.

**Figure S3.** Relative % wound closure induced by POAgNPs against **A.** MDA-MB-231 cells and **B.** MCF-7 cells after 12 hours and 24 hours. p- value was calculated by comparing means  $\pm$  SD of percentage of relative wound closure in POAgNPs treated groups with control groups.

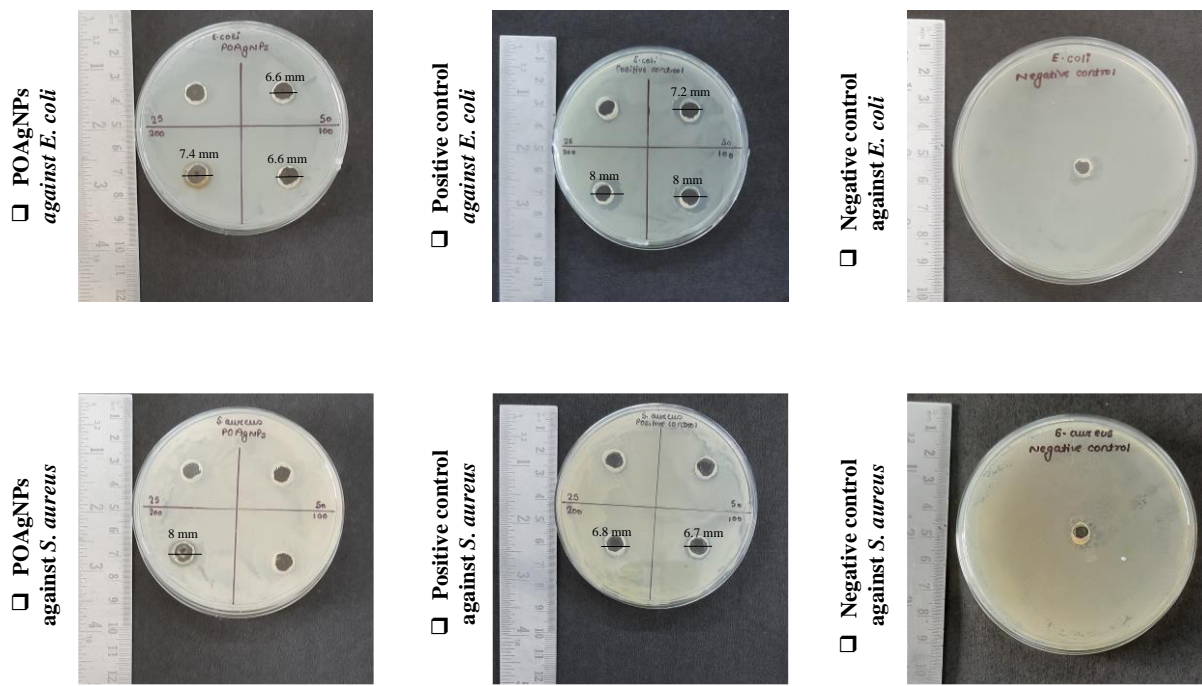

**Figure S1.** Antibacterial activity of POAgNPs represented through zone of inhibition against pathogenic bacterial strains.

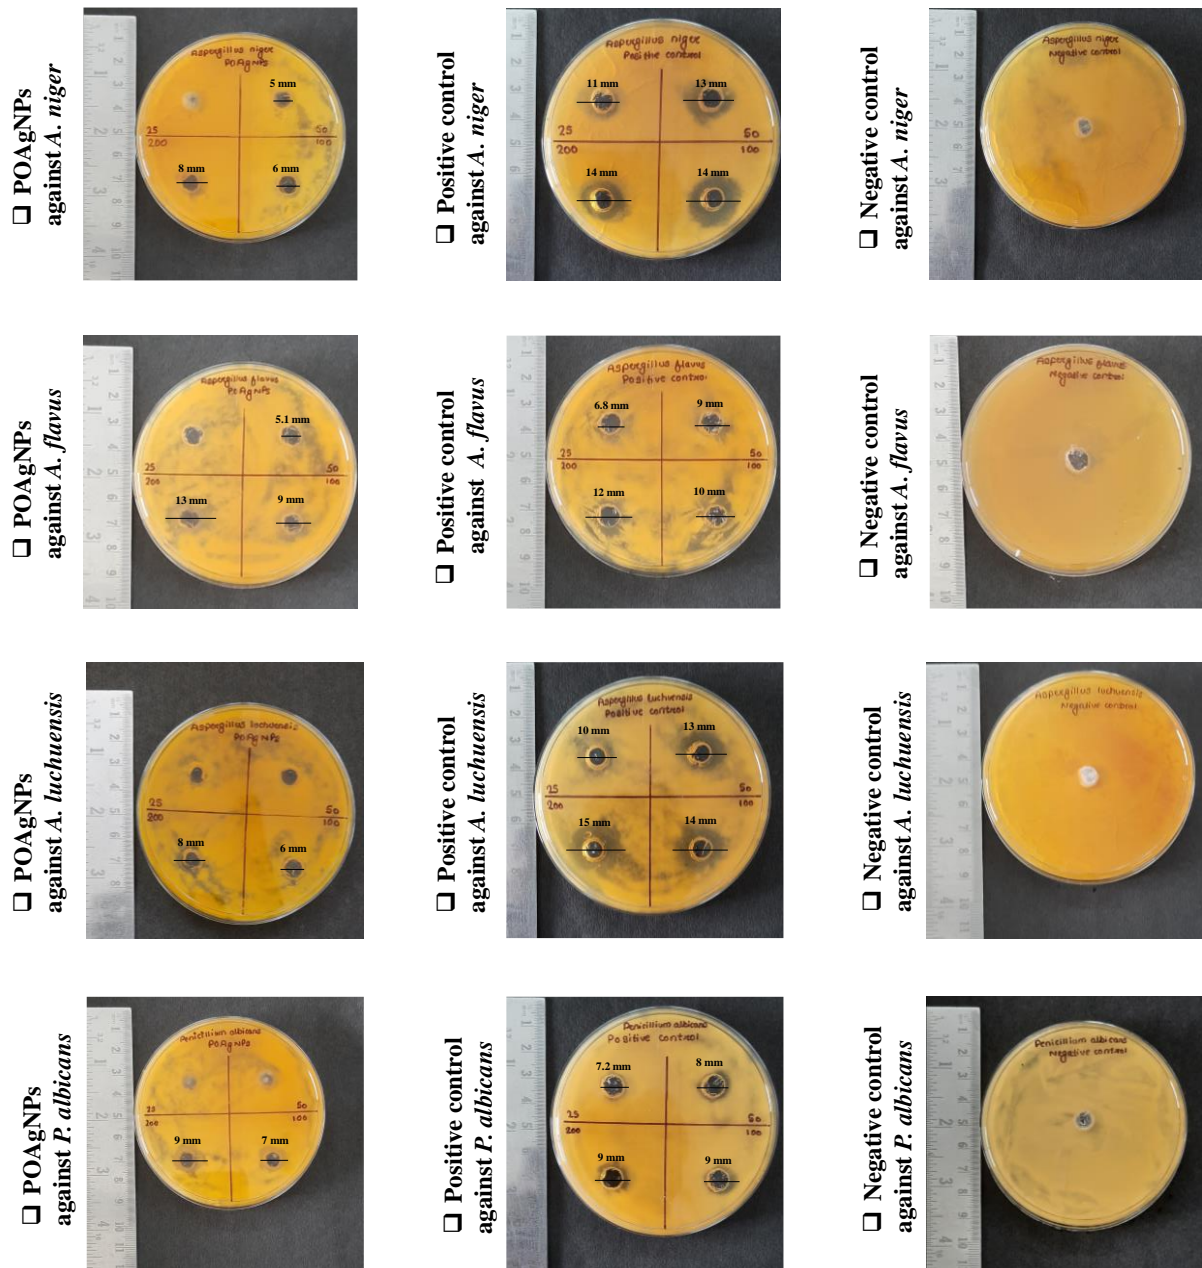

**Figure S2.** Representation of POAgNPs induced growth inhibition against pathogenic fungal strains.



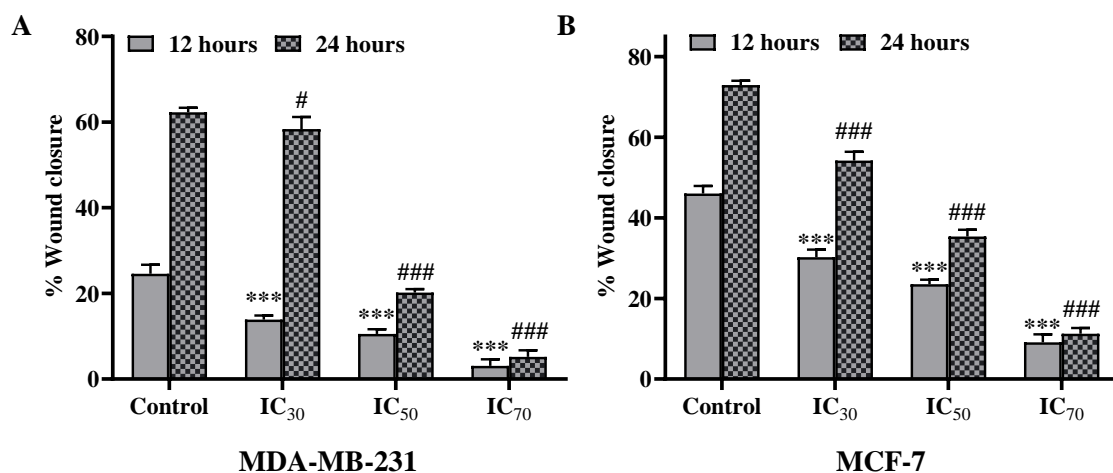

**Figure S3.** Relative % wound closure induced by POAgNPs against **A.** MDA-MB-231 cells and **B.** MCF-7 cells after 12 hours and 24 hours. p- value was calculated by comparing means  $\pm$  SD of percentage of relative wound closure in POAgNPs treated groups with control groups, using one way ANOVA followed by Tukey to determine statistical significance, which are follows; \*\*\*  $p \leq 0.001$ ; \*\*  $p \leq 0.002$ ; \*  $p \leq 0.033$  for 12 hours and ###  $p \leq 0.0015$ ; ##  $p \leq 0.002$ ; #  $p \leq 0.033$  for 24 hours
